# Supplementary material for: Isolation and structural characterization of stable carbamic–carbonic anhydrides: an experimental and computational study
Source: Royal Society of Chemistry journal article supplement (doi:10.1039/d2qo00038e), 2022-01-01
Supplement: d2qo00038e2.pdf [file d2qo00038e2.pdf]

## Electronic Supporting Information for:

# Isolation and Structural Characterization of Stable Carbamic-Carbonic Anhydrides: An Experimental and Computational Study

Ivo E. Sampaio-Dias,<sup>a,\*</sup> Carlos A. D. Sousa,<sup>b</sup> Sara C. Silva-Reis,<sup>a</sup>

Luís Pinto da Silva,<sup>c,d</sup> Xerardo García-Mera,<sup>e</sup> and José E. Rodríguez-Borges<sup>a</sup>

---

<sup>a</sup>LAQV/REQUIMTE, Department of Chemistry and Biochemistry, Faculty of Sciences, University of Porto, R. Campo Alegre 697, 4169-007 Porto, Portugal.

<sup>b</sup>CIPAN - Companhia Industrial Produtora de Antibióticos, SA; R. da Estação 42, Castanheira do Ribatejo, Portugal.

<sup>c</sup>Chemistry Research Unit (CIQUP), Institute of Molecular Sciences (IMS), Faculty of Sciences of University of Porto, R. Campo Alegre 697, 4169-007 Porto, Portugal.

<sup>d</sup>LACOMEPI, GreenUPorto, Department of Geosciences, Environment and Territorial Planning, Faculty of Sciences, University of Porto, R. Campo Alegre 697, 4169-007 Porto, Portugal.

<sup>e</sup>Department of Organic Chemistry, Faculty of Pharmacy, University of Santiago de Compostela, E-15782 Santiago de Compostela, Spain.

---

**\*Corresponding author e-mail:**

idias@fc.up.pt (Ivo E. Sampaio-Dias)

## Table of contents

|                                                                                               |     |
|-----------------------------------------------------------------------------------------------|-----|
| 1. NMR spectra for (S,S)- <b>2</b> , <b>4</b> , <b>6</b> , and <b>7</b>                       | S2  |
| 2. HRMS spectra of carbamic-carbonic anhydrides <b>4</b> and <b>7</b>                         | S8  |
| 3. Crystal data and structure refinement for the carbamic-carbonic anhydride <b>4</b>         | S9  |
| 4. Potential energy curve of the C2-O2 bond breaking of the <i>trans</i> -species of <b>4</b> | S18 |
| 5. Potential energy curve of the N1-C1 bond breaking of the <i>cis</i> -species of <b>4</b>   | S19 |

## 1. NMR spectra

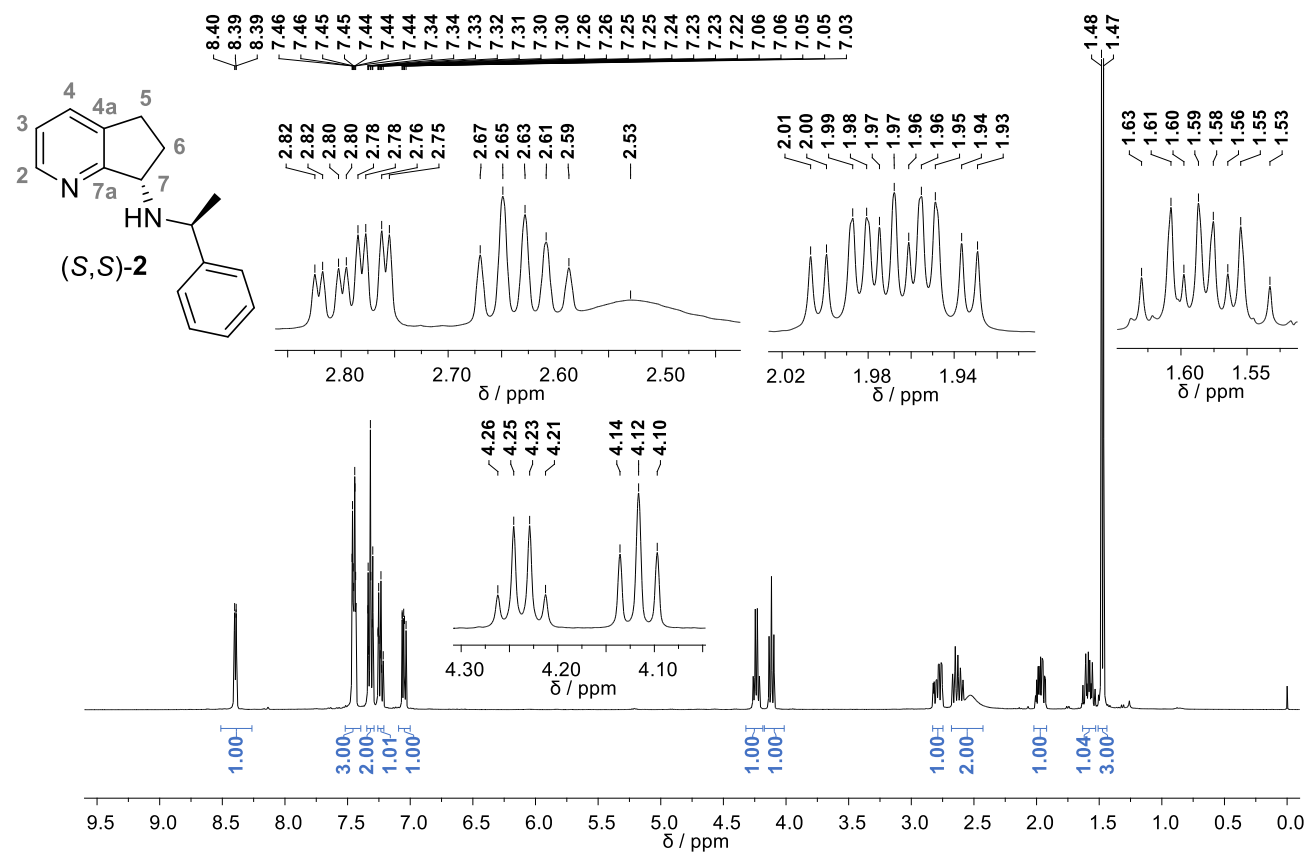Figure S1. <sup>1</sup>H NMR spectrum (400 MHz, CDCl<sub>3</sub>) of compound (S,S)-2.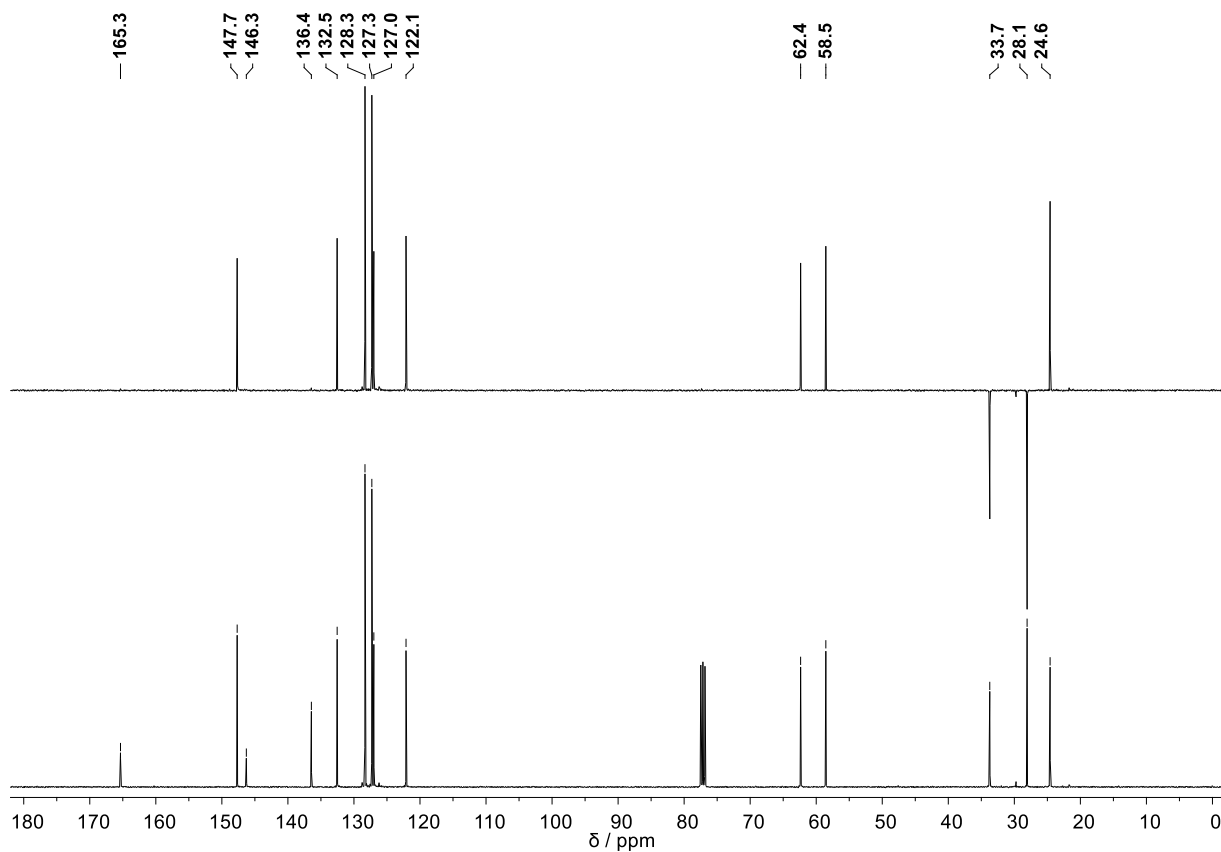Figure S2. <sup>13</sup>C{<sup>1</sup>H} and DEPT-135 NMR spectra (101 MHz, CDCl<sub>3</sub>) of compound (S,S)-2.

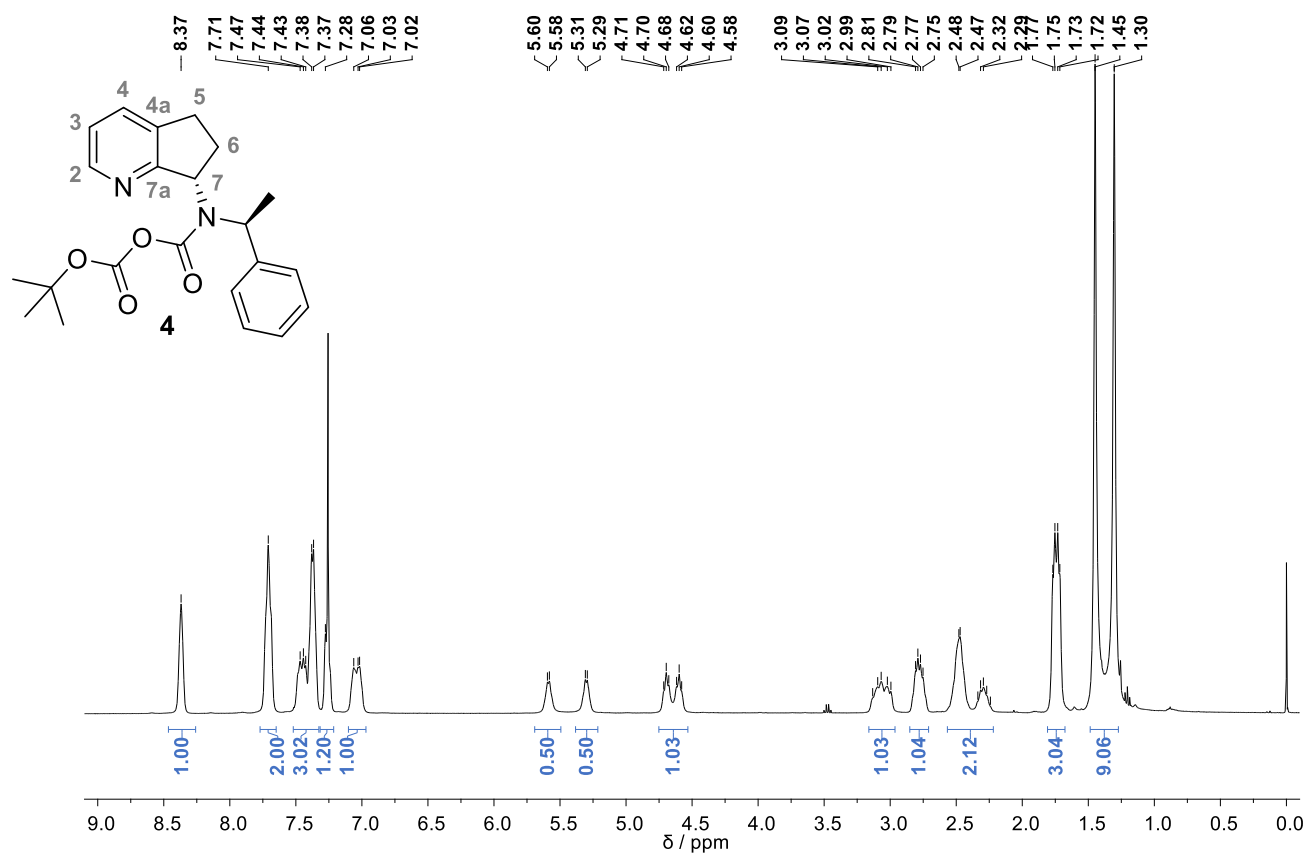

Figure S3. <sup>1</sup>H NMR spectrum (400 MHz, CDCl<sub>3</sub>) of compound 4 (50:50 mixture of conformers).

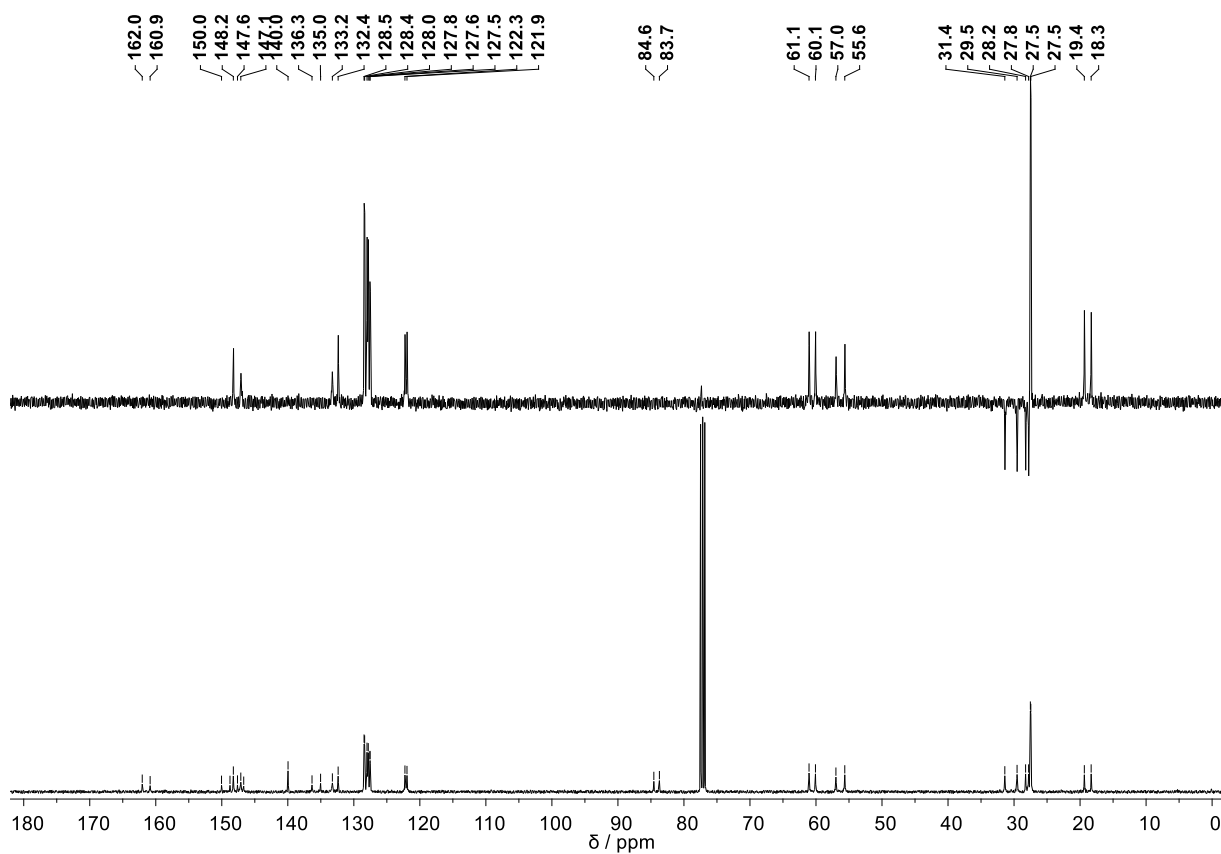

Figure S4. <sup>13</sup>C{<sup>1</sup>H} and DEPT-135 NMR spectra (100 MHz, CDCl<sub>3</sub>) of compound 4 (mixture of conformers).

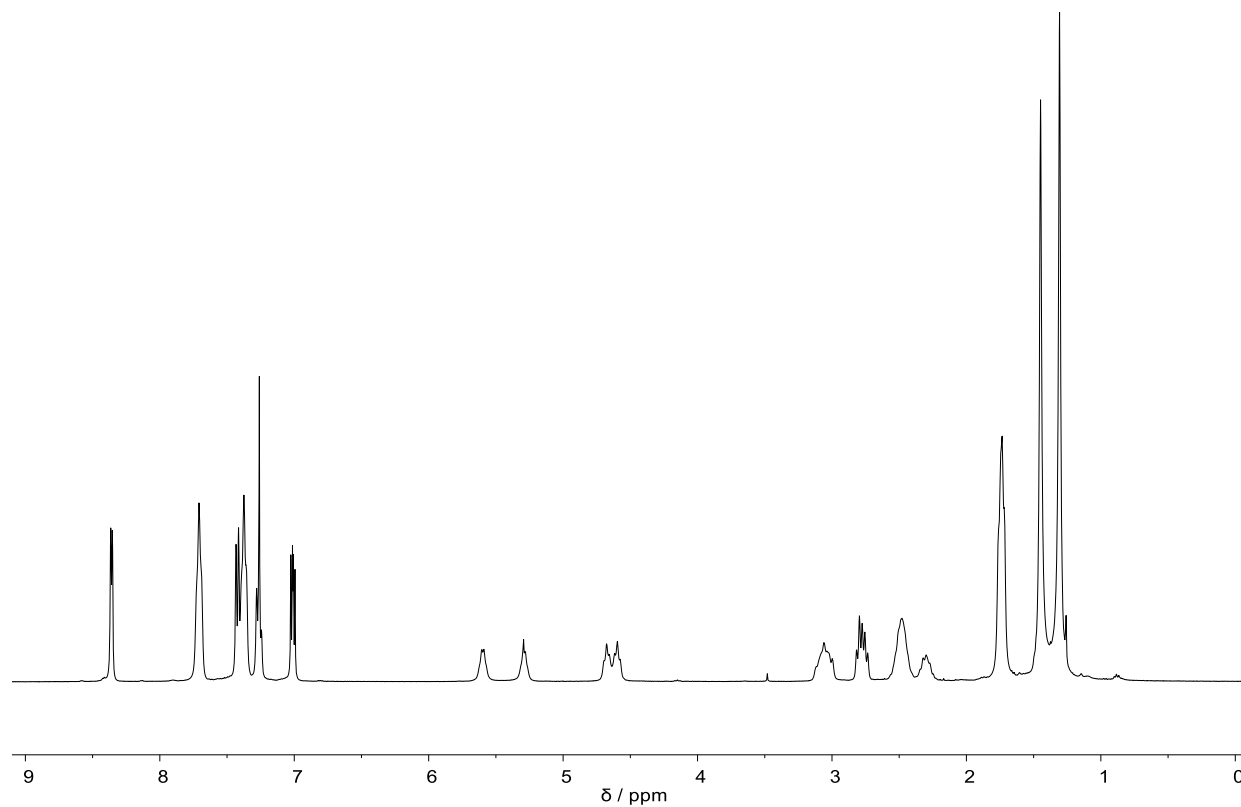

**Figure S5.** <sup>1</sup>H NMR spectrum (400 MHz, CDCl<sub>3</sub>, 25 °C) of compound **4** (50:50 mixture of conformers), after heating at 109 °C (melting) for 1 min.

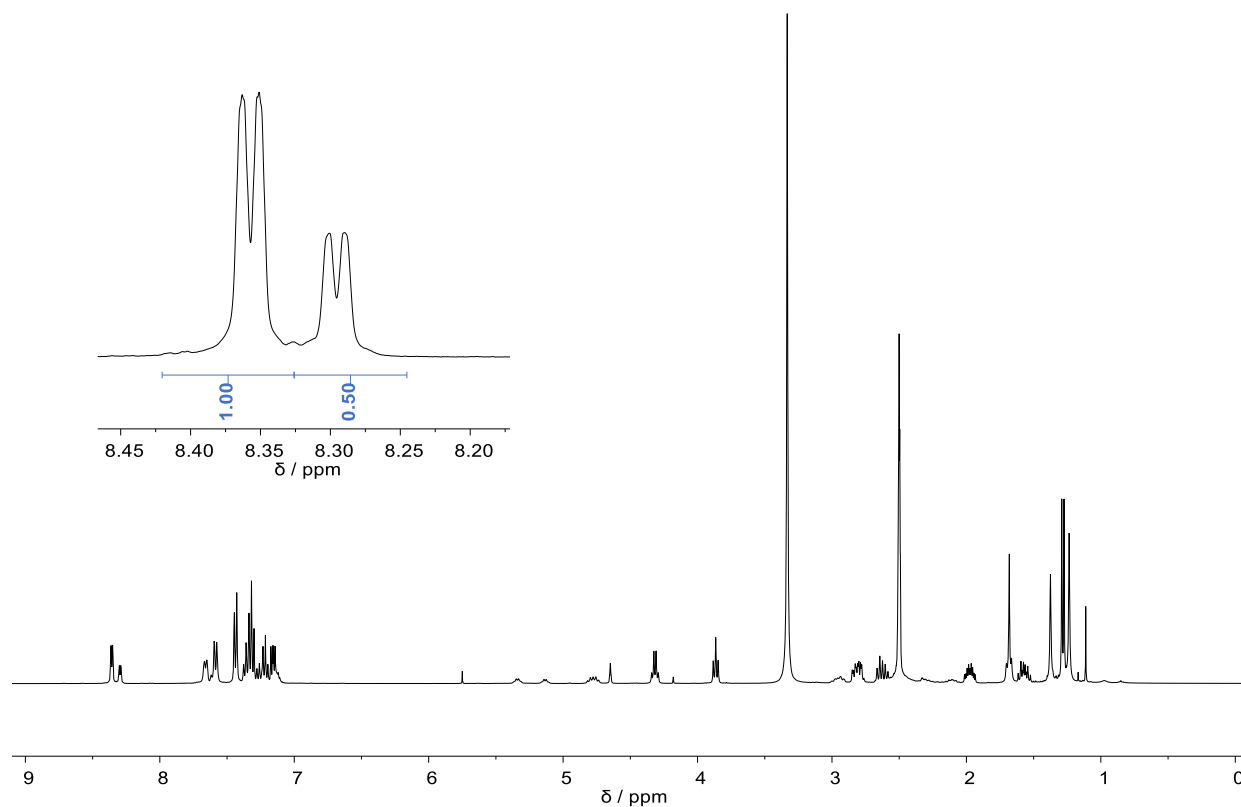

**Figure S6.** <sup>1</sup>H NMR spectrum (400 MHz, CDCl<sub>3</sub>, 25 °C) of compound **4**, after heating at 140 °C for 1 min, exhibiting a mixture of **2** and **3** in a ratio of 67:33, respectively.

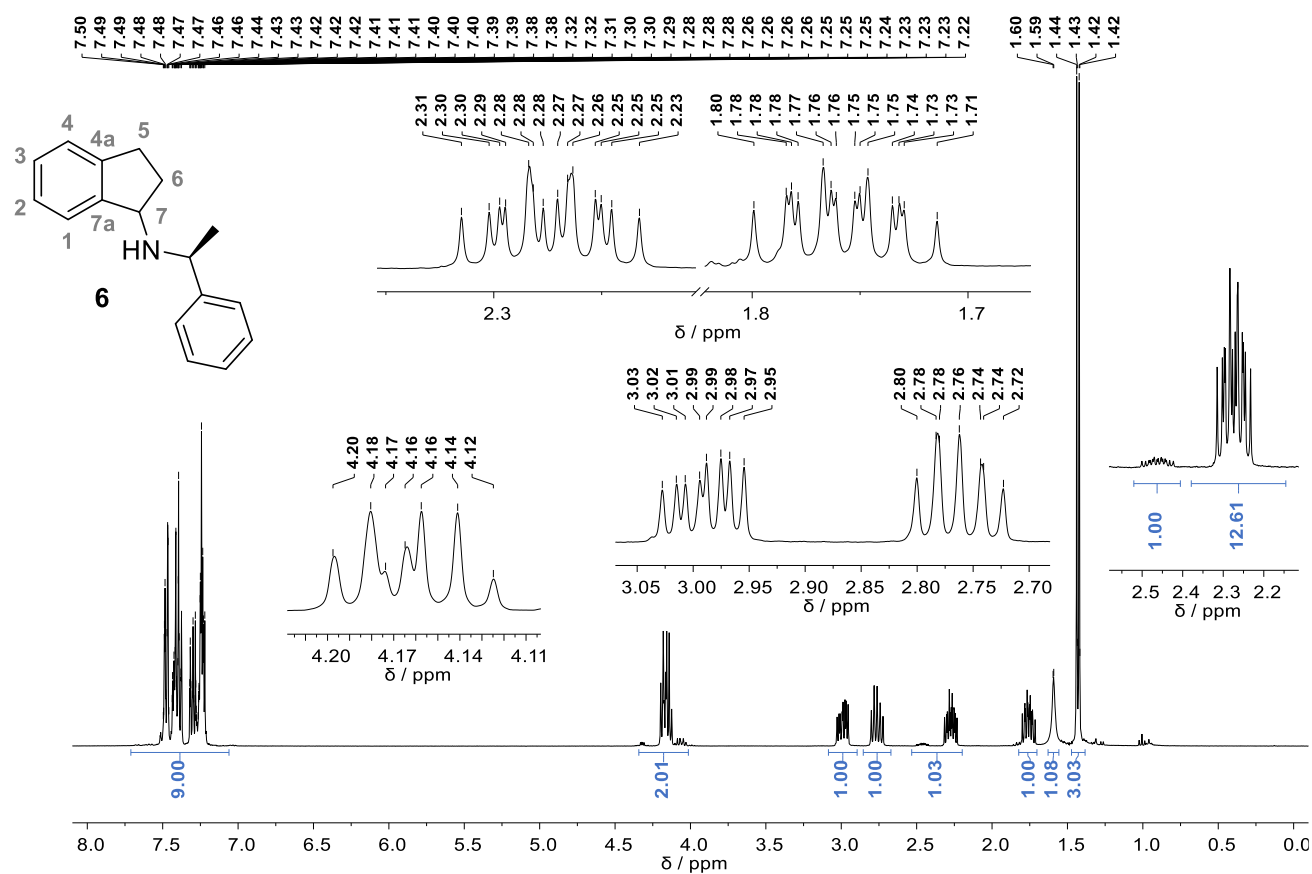Figure S7.  $^1\text{H}$  NMR spectrum (400 MHz,  $\text{CDCl}_3$ ) of compound **6**.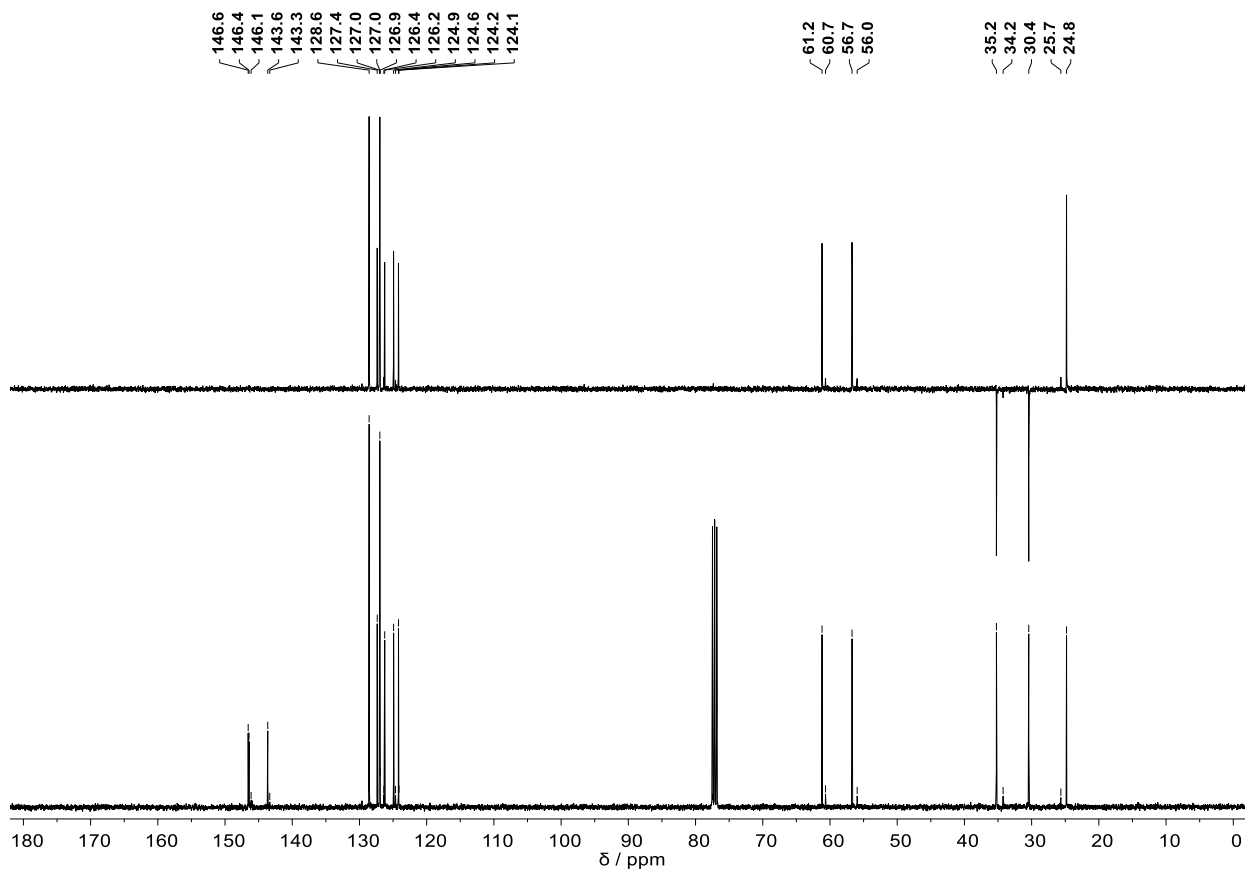Figure S8.  $^{13}\text{C}\{^1\text{H}\}$  and DEPT-135 NMR spectra (101 MHz,  $\text{CDCl}_3$ ) of compound **6**.

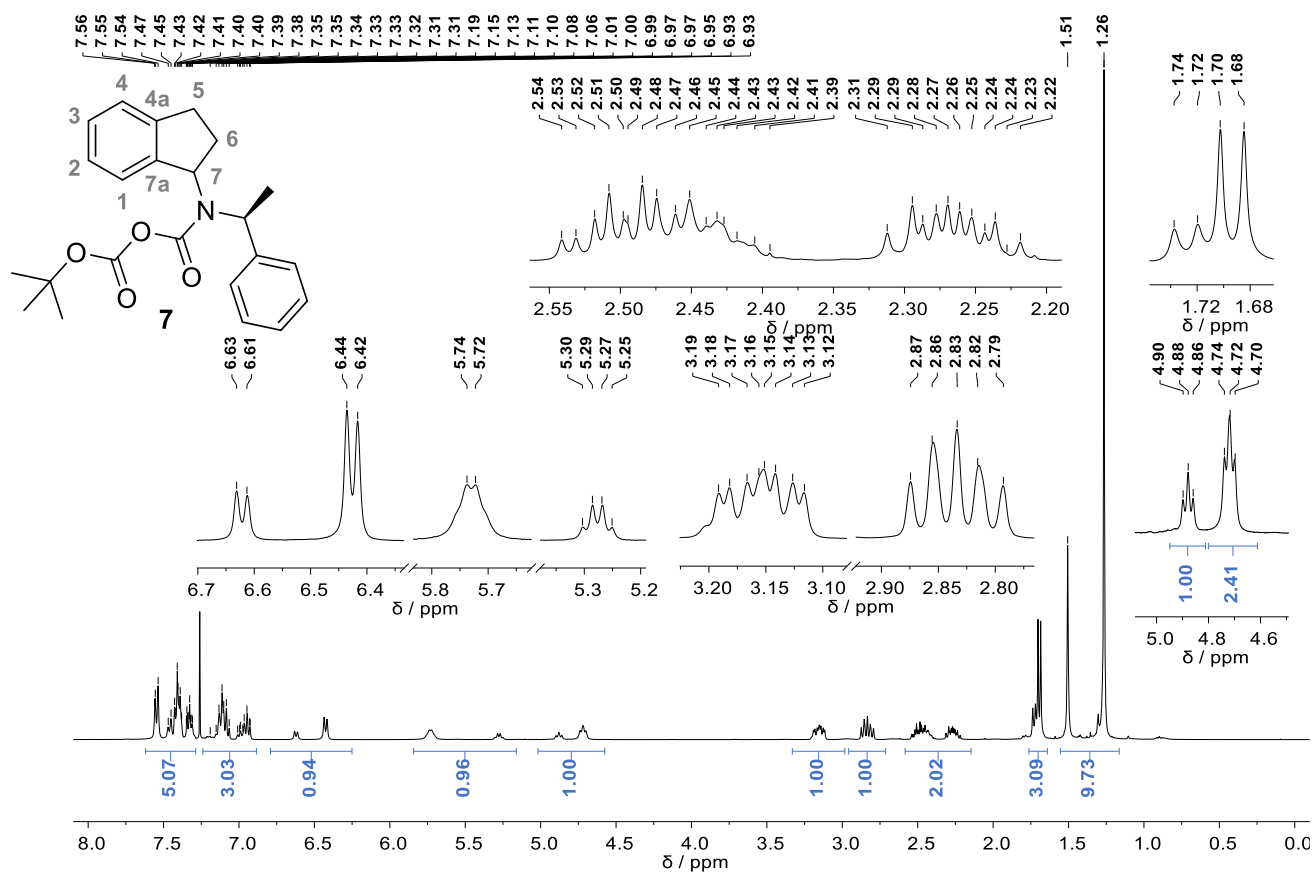

Figure S9.  $^1\text{H}$  NMR spectrum (400 MHz,  $\text{CDCl}_3$ ) of compound 7 (71:29 mixture of conformers).

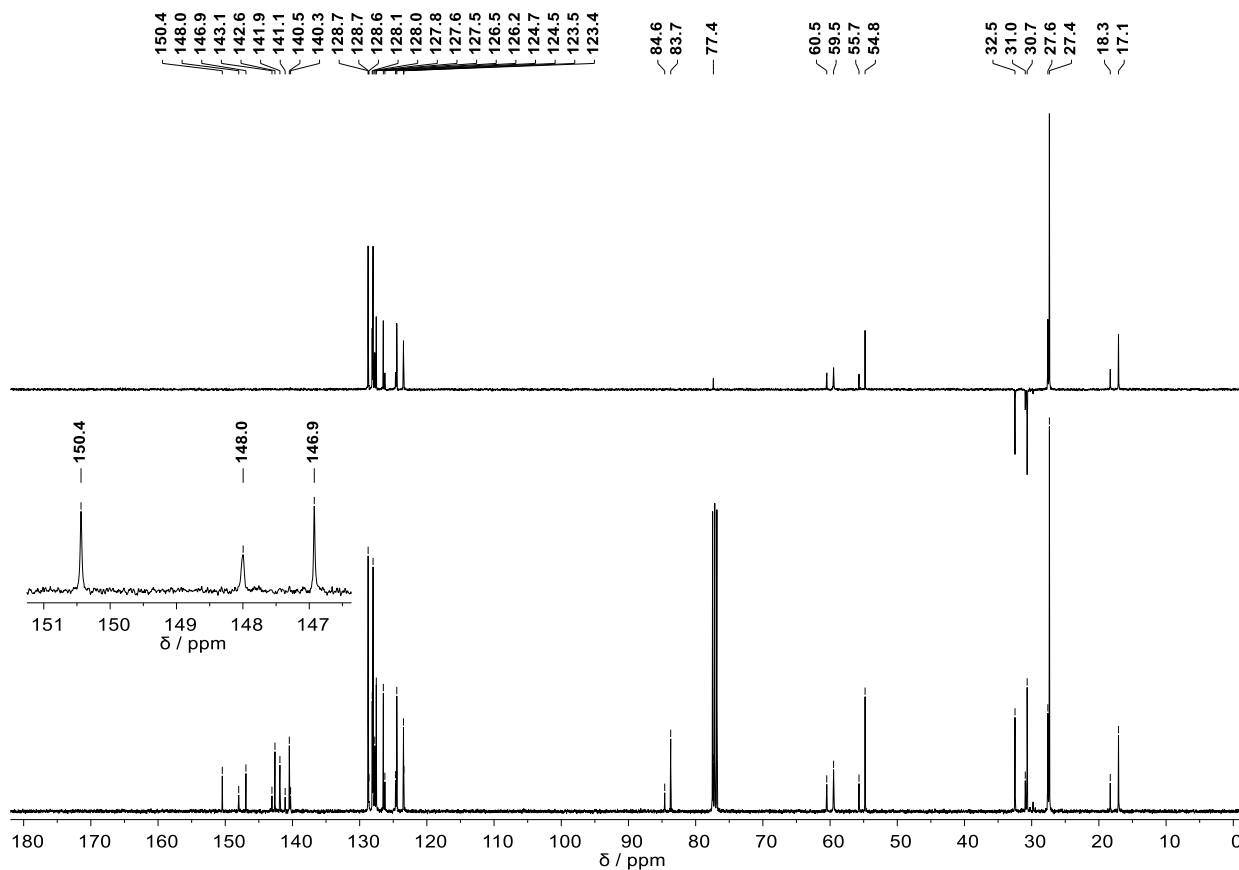

Figure S10.  $^{13}\text{C}\{^1\text{H}\}$  and DEPT-135 NMR spectra (100 MHz,  $\text{CDCl}_3$ ) of compound 7 (mixture of conformers).

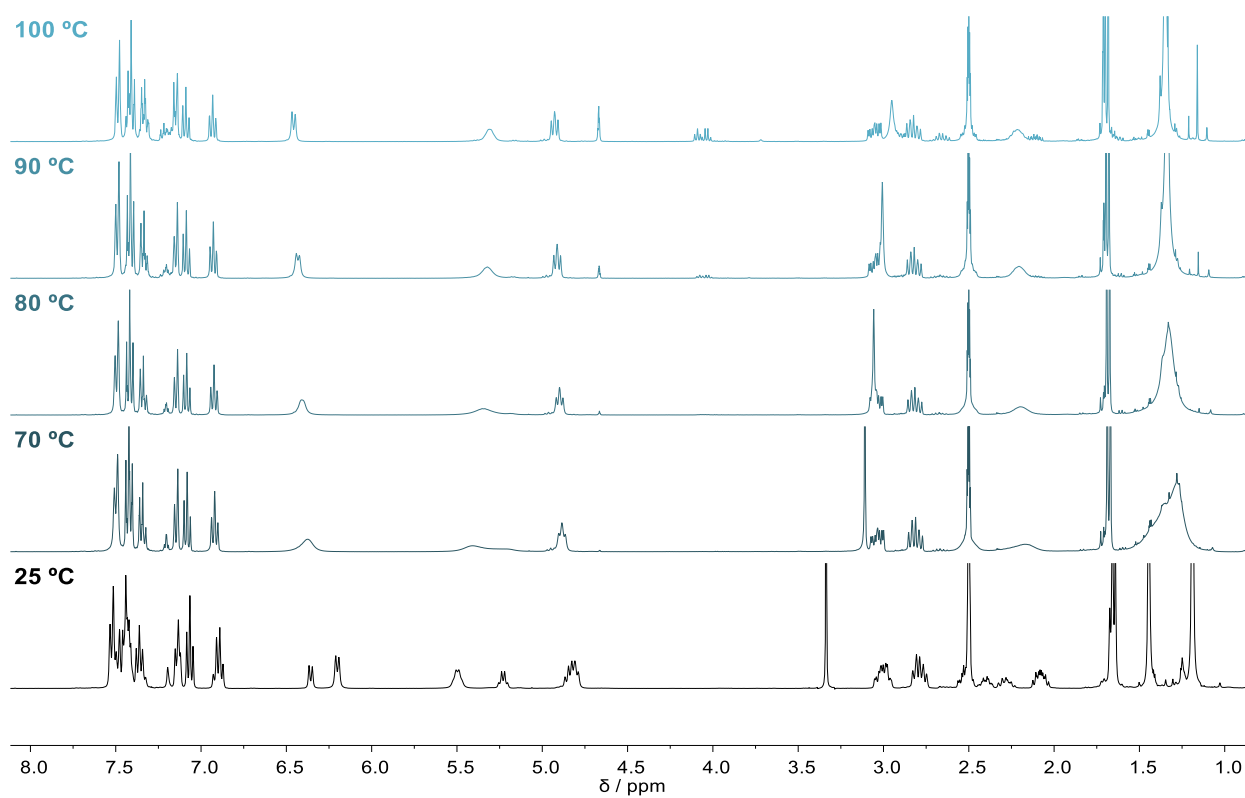

**Figure S11.** Stacked  $^1\text{H}$  NMR spectra of variable-temperature experiments (400 MHz,  $\text{DMSO-}d_6$ ) for carbamic-carbonic anhydride **7** at 25, 70, 80, 90, and 100 °C.

## 2. HRMS spectrum

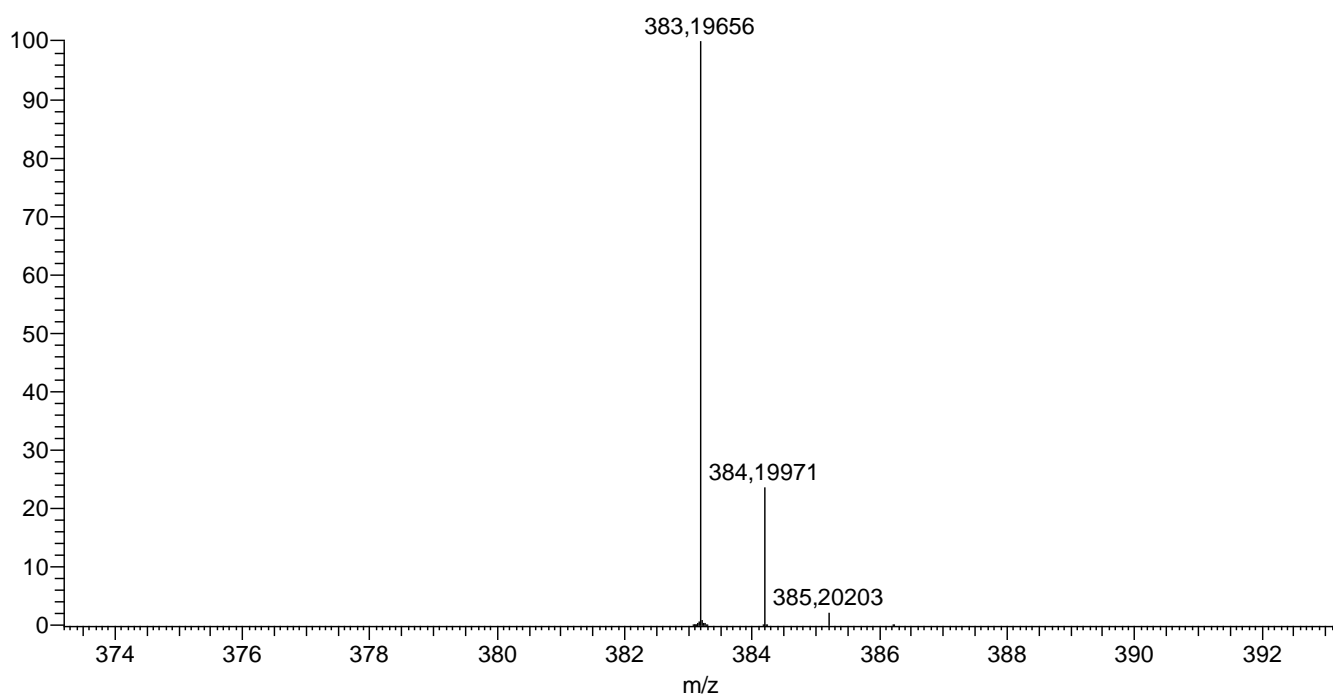

**Figure S12.** HRMS (ESI-TOF) spectrum of carbamic-carbonic anhydride **4**,  $m/z$  calcd for  $C_{22}H_{27}N_2O_4^+$ : 383.19653; found: 383.19656.

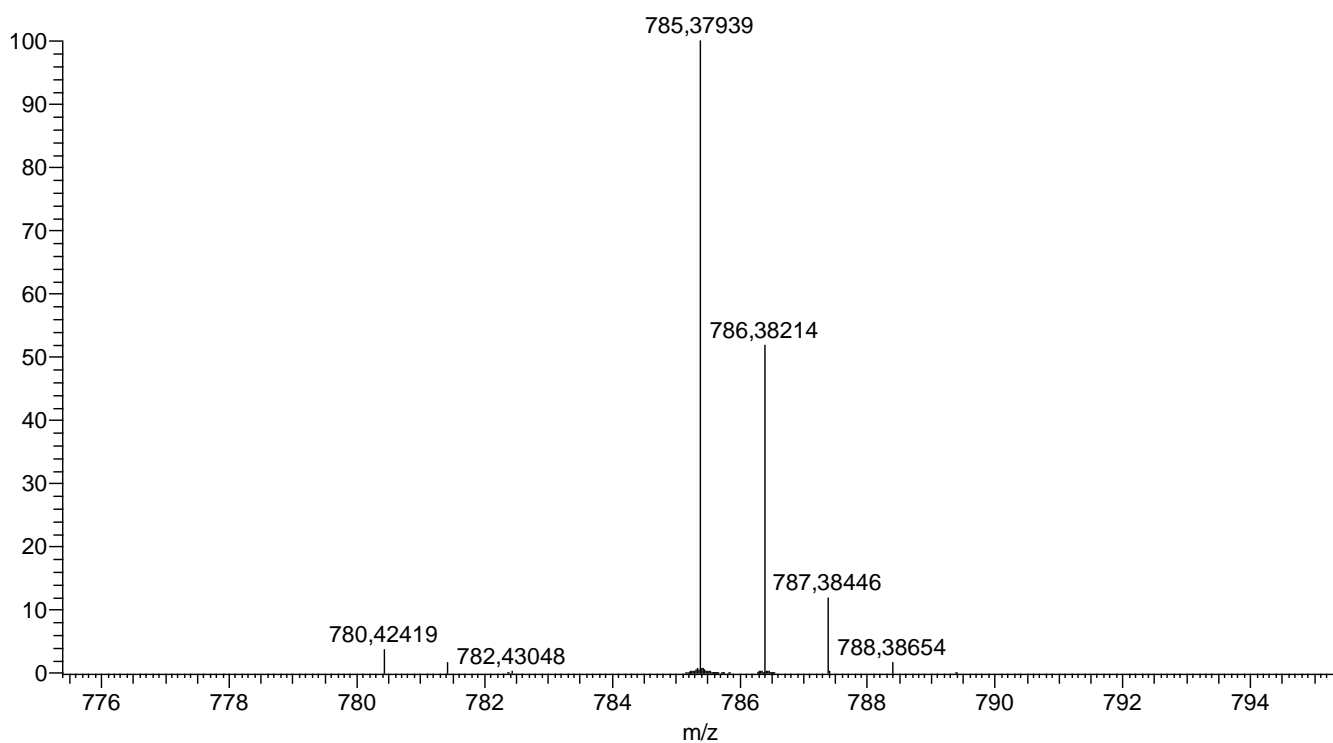

**Figure S13.** HRMS (ESI-TOF) spectrum of carbamic-carbonic anhydride **7**,  $m/z$  calcd for  $C_{46}H_{54}N_2O_8Na^+ [2M + Na]^+$ : 785.37724; found: 785.37939.



## 3. Crystal data and structure refinement

Table S1. Crystal data and structure refinement for 4.

|                                   |                                                               |            |
|-----------------------------------|---------------------------------------------------------------|------------|
| Identification code               | shelx                                                         |            |
| Empirical formula                 | C <sub>22</sub> H <sub>26</sub> N <sub>2</sub> O <sub>4</sub> |            |
| Formula weight                    | 382.45                                                        |            |
| Temperature                       | 100(2) K                                                      |            |
| Wavelength                        | 0.71073 Å                                                     |            |
| Crystal system                    | Tetragonal                                                    |            |
| Space group                       | I4                                                            |            |
| Unit cell dimensions              | a = 21.4753(12) Å                                             | α = 90.00° |
|                                   | b = 21.4753(12) Å                                             | β = 90.00° |
|                                   | c = 9.2644(5) Å                                               | γ = 90.00° |
| Volume                            | 4272.6(5) Å <sup>3</sup>                                      |            |
| Z                                 | 8                                                             |            |
| Density (calculated)              | 1.189 Mg/m <sup>3</sup>                                       |            |
| Absorption coefficient            | 0.082 mm <sup>-1</sup>                                        |            |
| F(000)                            | 1632                                                          |            |
| Crystal size                      | 0.520 x 0.290 x 0.140 mm <sup>3</sup>                         |            |
| Theta range for data collection   | 1.341 to 30.161°                                              |            |
| Index ranges                      | -28 ≤ h ≤ 29, -30 ≤ k ≤ 30, -12 ≤ l ≤ 12                      |            |
| Reflections collected             | 21153                                                         |            |
| Independent reflections           | 6244 [R(int) = 0.0508]                                        |            |
| Completeness to theta = 25.242°   | 100.0 %                                                       |            |
| Refinement method                 | Full-matrix least-squares on F <sup>2</sup>                   |            |
| Data / restraints / parameters    | 6244 / 1 / 257                                                |            |
| Goodness-of-fit on F <sup>2</sup> | 1.062                                                         |            |
| Final R indices [I > 2σ(I)]       | R1 = 0.0542, wR2 = 0.1058                                     |            |
| R indices (all data)              | R1 = 0.0698, wR2 = 0.1111                                     |            |
| Absolute structure parameter      | 0.1(5)                                                        |            |
| Largest diff. peak and hole       | 0.248 and -0.239 e.Å <sup>-3</sup>                            |            |

**Table S2.** Atomic coordinates ( $\times 10^4$ ) and equivalent isotropic displacement parameters ( $\text{\AA}^2 \times 10^3$ ) for **4**.  $U(\text{eq})$  is defined as one-third of the trace of the orthogonalized  $U^{ij}$  tensor.

|       | x       | y       | z       | $U(\text{eq})$ |
|-------|---------|---------|---------|----------------|
| N(1)  | 6426(1) | 1650(1) | 3808(2) | 22(1)          |
| C(2)  | 6897(1) | 1979(1) | 4352(3) | 18(1)          |
| C(3)  | 7492(1) | 1754(1) | 4606(3) | 21(1)          |
| C(4)  | 7621(1) | 1145(1) | 4236(3) | 26(1)          |
| C(5)  | 7146(1) | 789(1)  | 3657(3) | 27(1)          |
| C(6)  | 6564(1) | 1058(1) | 3480(3) | 25(1)          |
| C(7)  | 6867(1) | 2669(1) | 4718(3) | 20(1)          |
| C(8)  | 7445(1) | 2762(1) | 5691(3) | 24(1)          |
| C(9)  | 7906(1) | 2254(1) | 5209(3) | 25(1)          |
| N(10) | 6274(1) | 2902(1) | 5283(2) | 21(1)          |
| C(11) | 6046(1) | 3508(1) | 4743(3) | 27(1)          |
| C(12) | 5875(1) | 3475(1) | 3157(3) | 22(1)          |
| C(13) | 5639(1) | 2929(1) | 2565(3) | 22(1)          |
| C(14) | 5456(1) | 2900(1) | 1134(3) | 27(1)          |
| C(15) | 5500(1) | 3420(1) | 254(3)  | 30(1)          |
| C(16) | 5736(1) | 3963(1) | 819(3)  | 31(1)          |
| C(17) | 5924(1) | 3996(1) | 2256(3) | 27(1)          |
| C(18) | 6520(2) | 4017(2) | 5108(5) | 61(1)          |
| C(19) | 5962(1) | 2641(1) | 6384(3) | 21(1)          |
| O(20) | 5477(1) | 2803(1) | 6901(2) | 31(1)          |
| O(21) | 6314(1) | 2152(1) | 6971(2) | 20(1)          |
| C(22) | 6019(1) | 1620(1) | 7394(3) | 20(1)          |
| O(23) | 5498(1) | 1481(1) | 7078(2) | 29(1)          |
| O(24) | 6429(1) | 1311(1) | 8153(2) | 20(1)          |
| C(25) | 6281(1) | 671(1)  | 8666(3) | 25(1)          |
| C(26) | 5746(2) | 696(2)  | 9722(3) | 39(1)          |
| C(27) | 6877(1) | 481(1)  | 9414(3) | 30(1)          |
| C(28) | 6159(2) | 259(1)  | 7371(4) | 45(1)          |

**Table S3.** Bond lengths [Å] and angles [°] for **4**.

|              |          |
|--------------|----------|
| N(1)-C(2)    | 1.332(3) |
| N(1)-C(6)    | 1.342(3) |
| C(2)-C(3)    | 1.387(3) |
| C(2)-C(7)    | 1.522(4) |
| C(3)-C(4)    | 1.380(4) |
| C(3)-C(9)    | 1.501(4) |
| C(4)-C(5)    | 1.382(4) |
| C(4)-H(4)    | 0.9500   |
| C(5)-C(6)    | 1.387(4) |
| C(5)-H(5)    | 0.9500   |
| C(6)-H(6)    | 0.9500   |
| C(7)-N(10)   | 1.464(3) |
| C(7)-C(8)    | 1.548(4) |
| C(7)-H(7)    | 1.0000   |
| C(8)-C(9)    | 1.538(4) |
| C(8)-H(8A)   | 0.9900   |
| C(8)-H(8B)   | 0.9900   |
| C(9)-H(9A)   | 0.9900   |
| C(9)-H(9B)   | 0.9900   |
| N(10)-C(19)  | 1.343(4) |
| N(10)-C(11)  | 1.477(3) |
| C(11)-C(12)  | 1.517(4) |
| C(11)-C(18)  | 1.532(4) |
| C(11)-H(11)  | 1.0000   |
| C(12)-C(13)  | 1.390(4) |
| C(12)-C(17)  | 1.400(4) |
| C(13)-C(14)  | 1.385(4) |
| C(13)-H(13)  | 0.9500   |
| C(14)-C(15)  | 1.385(4) |
| C(14)-H(14)  | 0.9500   |
| C(15)-C(16)  | 1.375(4) |
| C(15)-H(15)  | 0.9500   |
| C(16)-C(17)  | 1.393(4) |
| C(16)-H(16)  | 0.9500   |
| C(17)-H(17)  | 0.9500   |
| C(18)-H(18A) | 0.9800   |
| C(18)-H(18B) | 0.9800   |

## Electronic Supporting Information

---

|                 |          |
|-----------------|----------|
| C(18)-H(18C)    | 0.9800   |
| C(19)-O(20)     | 1.199(3) |
| C(19)-O(21)     | 1.403(3) |
| O(21)-C(22)     | 1.364(3) |
| C(22)-O(23)     | 1.193(3) |
| C(22)-O(24)     | 1.309(3) |
| O(24)-C(25)     | 1.489(3) |
| C(25)-C(26)     | 1.510(4) |
| C(25)-C(27)     | 1.511(4) |
| C(25)-C(28)     | 1.514(4) |
| C(26)-H(26A)    | 0.9800   |
| C(26)-H(26B)    | 0.9800   |
| C(26)-H(26C)    | 0.9800   |
| C(27)-H(27A)    | 0.9800   |
| C(27)-H(27B)    | 0.9800   |
| C(27)-H(27C)    | 0.9800   |
| C(28)-H(28A)    | 0.9800   |
| C(28)-H(28B)    | 0.9800   |
| C(28)-H(28C)    | 0.9800   |
|                 |          |
| C(2)-N(1)-C(6)  | 114.9(2) |
| N(1)-C(2)-C(3)  | 125.4(2) |
| N(1)-C(2)-C(7)  | 124.6(2) |
| C(3)-C(2)-C(7)  | 109.9(2) |
| C(4)-C(3)-C(2)  | 118.2(2) |
| C(4)-C(3)-C(9)  | 130.7(2) |
| C(2)-C(3)-C(9)  | 111.1(2) |
| C(3)-C(4)-C(5)  | 118.2(3) |
| C(3)-C(4)-H(4)  | 120.9    |
| C(5)-C(4)-H(4)  | 120.9    |
| C(4)-C(5)-C(6)  | 118.8(3) |
| C(4)-C(5)-H(5)  | 120.6    |
| C(6)-C(5)-H(5)  | 120.6    |
| N(1)-C(6)-C(5)  | 124.5(3) |
| N(1)-C(6)-H(6)  | 117.7    |
| C(5)-C(6)-H(6)  | 117.7    |
| N(10)-C(7)-C(2) | 116.7(2) |
| N(10)-C(7)-C(8) | 116.4(2) |
| C(2)-C(7)-C(8)  | 102.8(2) |
| N(10)-C(7)-H(7) | 106.7    |

## Electronic Supporting Information

---

|                   |          |
|-------------------|----------|
| C(2)-C(7)-H(7)    | 106.7    |
| C(8)-C(7)-H(7)    | 106.7    |
| C(9)-C(8)-C(7)    | 104.8(2) |
| C(9)-C(8)-H(8A)   | 110.8    |
| C(7)-C(8)-H(8A)   | 110.8    |
| C(9)-C(8)-H(8B)   | 110.8    |
| C(7)-C(8)-H(8B)   | 110.8    |
| H(8A)-C(8)-H(8B)  | 108.9    |
| C(3)-C(9)-C(8)    | 103.6(2) |
| C(3)-C(9)-H(9A)   | 111.0    |
| C(8)-C(9)-H(9A)   | 111.0    |
| C(3)-C(9)-H(9B)   | 111.0    |
| C(8)-C(9)-H(9B)   | 111.0    |
| H(9A)-C(9)-H(9B)  | 109.0    |
| C(19)-N(10)-C(7)  | 124.2(2) |
| C(19)-N(10)-C(11) | 117.3(2) |
| C(7)-N(10)-C(11)  | 117.9(2) |
| N(10)-C(11)-C(12) | 111.6(2) |
| N(10)-C(11)-C(18) | 109.5(2) |
| C(12)-C(11)-C(18) | 114.1(3) |
| N(10)-C(11)-H(11) | 107.1    |
| C(12)-C(11)-H(11) | 107.1    |
| C(18)-C(11)-H(11) | 107.1    |
| C(13)-C(12)-C(17) | 117.8(3) |
| C(13)-C(12)-C(11) | 120.6(2) |
| C(17)-C(12)-C(11) | 121.5(2) |
| C(14)-C(13)-C(12) | 121.2(3) |
| C(14)-C(13)-H(13) | 119.4    |
| C(12)-C(13)-H(13) | 119.4    |
| C(15)-C(14)-C(13) | 120.5(3) |
| C(15)-C(14)-H(14) | 119.7    |
| C(13)-C(14)-H(14) | 119.7    |
| C(16)-C(15)-C(14) | 119.0(3) |
| C(16)-C(15)-H(15) | 120.5    |
| C(14)-C(15)-H(15) | 120.5    |
| C(15)-C(16)-C(17) | 120.9(3) |
| C(15)-C(16)-H(16) | 119.5    |
| C(17)-C(16)-H(16) | 119.5    |
| C(16)-C(17)-C(12) | 120.5(3) |
| C(16)-C(17)-H(17) | 119.8    |

## Electronic Supporting Information

---

|                     |          |
|---------------------|----------|
| C(12)-C(17)-H(17)   | 119.8    |
| C(11)-C(18)-H(18A)  | 109.5    |
| C(11)-C(18)-H(18B)  | 109.5    |
| H(18A)-C(18)-H(18B) | 109.5    |
| C(11)-C(18)-H(18C)  | 109.5    |
| H(18A)-C(18)-H(18C) | 109.5    |
| H(18B)-C(18)-H(18C) | 109.5    |
| O(20)-C(19)-N(10)   | 128.0(3) |
| O(20)-C(19)-O(21)   | 122.0(2) |
| N(10)-C(19)-O(21)   | 109.8(2) |
| C(22)-O(21)-C(19)   | 119.2(2) |
| O(23)-C(22)-O(24)   | 129.6(2) |
| O(23)-C(22)-O(21)   | 125.0(2) |
| O(24)-C(22)-O(21)   | 105.4(2) |
| C(22)-O(24)-C(25)   | 119.7(2) |
| O(24)-C(25)-C(26)   | 109.6(2) |
| O(24)-C(25)-C(27)   | 102.4(2) |
| C(26)-C(25)-C(27)   | 110.9(2) |
| O(24)-C(25)-C(28)   | 108.9(2) |
| C(26)-C(25)-C(28)   | 113.7(3) |
| C(27)-C(25)-C(28)   | 110.7(3) |
| C(25)-C(26)-H(26A)  | 109.5    |
| C(25)-C(26)-H(26B)  | 109.5    |
| H(26A)-C(26)-H(26B) | 109.5    |
| C(25)-C(26)-H(26C)  | 109.5    |
| H(26A)-C(26)-H(26C) | 109.5    |
| H(26B)-C(26)-H(26C) | 109.5    |
| C(25)-C(27)-H(27A)  | 109.5    |
| C(25)-C(27)-H(27B)  | 109.5    |
| H(27A)-C(27)-H(27B) | 109.5    |
| C(25)-C(27)-H(27C)  | 109.5    |
| H(27A)-C(27)-H(27C) | 109.5    |
| H(27B)-C(27)-H(27C) | 109.5    |
| C(25)-C(28)-H(28A)  | 109.5    |
| C(25)-C(28)-H(28B)  | 109.5    |
| H(28A)-C(28)-H(28B) | 109.5    |
| C(25)-C(28)-H(28C)  | 109.5    |
| H(28A)-C(28)-H(28C) | 109.5    |
| H(28B)-C(28)-H(28C) | 109.5    |

Electronic Supporting Information

**Table S4.** Anisotropic displacement parameters ( $\text{\AA}^2 \times 10^3$ ) for **4**. The anisotropic displacement factor exponent takes the form:  $-2\pi^2 [h^2 a^{*2} U^{11} + \dots + 2 h k a^* b^* U^{12}]$

|       | U <sup>11</sup> | U <sup>22</sup> | U <sup>33</sup> | U <sup>23</sup> | U <sup>13</sup> | U <sup>12</sup> |
|-------|-----------------|-----------------|-----------------|-----------------|-----------------|-----------------|
| N(1)  | 24(1)           | 24(1)           | 16(1)           | 1(1)            | -3(1)           | 4(1)            |
| C(2)  | 22(1)           | 23(1)           | 10(1)           | 4(1)            | -1(1)           | 2(1)            |
| C(3)  | 23(1)           | 30(1)           | 11(1)           | 7(1)            | 2(1)            | 2(1)            |
| C(4)  | 25(1)           | 33(2)           | 21(1)           | 6(1)            | 3(1)            | 9(1)            |
| C(5)  | 37(2)           | 28(1)           | 17(1)           | 0(1)            | -1(1)           | 11(1)           |
| C(6)  | 33(2)           | 25(1)           | 18(1)           | 0(1)            | -3(1)           | 3(1)            |
| C(7)  | 20(1)           | 20(1)           | 19(1)           | 3(1)            | -2(1)           | 0(1)            |
| C(8)  | 24(1)           | 24(1)           | 26(1)           | 4(1)            | -8(1)           | -3(1)           |
| C(9)  | 18(1)           | 34(2)           | 24(1)           | 8(1)            | -1(1)           | 0(1)            |
| N(10) | 24(1)           | 16(1)           | 22(1)           | 1(1)            | -5(1)           | 3(1)            |
| C(11) | 34(2)           | 15(1)           | 31(1)           | 0(1)            | -14(1)          | 4(1)            |
| C(12) | 16(1)           | 21(1)           | 28(1)           | 5(1)            | -4(1)           | 2(1)            |
| C(13) | 16(1)           | 23(1)           | 27(1)           | 9(1)            | -6(1)           | -3(1)           |
| C(14) | 20(1)           | 31(2)           | 29(2)           | 2(1)            | -6(1)           | -1(1)           |
| C(15) | 24(1)           | 43(2)           | 23(1)           | 10(1)           | -2(1)           | 9(1)            |
| C(16) | 30(2)           | 30(2)           | 35(2)           | 17(1)           | 5(1)            | 7(1)            |
| C(17) | 26(1)           | 21(1)           | 35(2)           | 4(1)            | -3(1)           | 0(1)            |
| C(18) | 82(3)           | 19(2)           | 81(3)           | 4(2)            | -58(3)          | -6(2)           |
| C(19) | 26(1)           | 20(1)           | 17(1)           | -6(1)           | -5(1)           | 2(1)            |
| O(20) | 27(1)           | 32(1)           | 35(1)           | -3(1)           | 4(1)            | 8(1)            |
| O(21) | 21(1)           | 22(1)           | 17(1)           | 2(1)            | -1(1)           | 0(1)            |
| C(22) | 25(1)           | 23(1)           | 11(1)           | -2(1)           | 0(1)            | -1(1)           |
| O(23) | 28(1)           | 34(1)           | 26(1)           | 4(1)            | -8(1)           | -6(1)           |
| O(24) | 23(1)           | 18(1)           | 20(1)           | 1(1)            | -2(1)           | 0(1)            |
| C(25) | 37(2)           | 20(1)           | 18(1)           | 2(1)            | 1(1)            | -3(1)           |
| C(26) | 34(2)           | 53(2)           | 29(2)           | 16(2)           | 4(1)            | -1(2)           |
| C(27) | 38(2)           | 26(1)           | 27(2)           | 6(1)            | 3(1)            | 7(1)            |
| C(28) | 79(3)           | 22(2)           | 36(2)           | -4(1)           | -9(2)           | -7(2)           |

Electronic Supporting Information

---

**Table S5.** Hydrogen coordinates ( $\times 10^4$ ) and isotropic displacement parameters ( $\text{\AA}^2 \times 10^3$ ) for **4**.

|        | x    | y    | z     | U(eq) |
|--------|------|------|-------|-------|
| H(4)   | 8025 | 975  | 4376  | 32    |
| H(5)   | 7218 | 369  | 3386  | 33    |
| H(6)   | 6240 | 804  | 3101  | 30    |
| H(7)   | 6949 | 2901 | 3801  | 24    |
| H(8A)  | 7626 | 3181 | 5549  | 29    |
| H(8B)  | 7335 | 2710 | 6721  | 29    |
| H(9A)  | 8194 | 2414 | 4463  | 30    |
| H(9B)  | 8151 | 2097 | 6037  | 30    |
| H(11)  | 5656 | 3606 | 5286  | 32    |
| H(13)  | 5603 | 2568 | 3154  | 26    |
| H(14)  | 5298 | 2521 | 752   | 32    |
| H(15)  | 5369 | 3401 | -725  | 36    |
| H(16)  | 5771 | 4320 | 221   | 38    |
| H(17)  | 6086 | 4375 | 2628  | 33    |
| H(18A) | 6893 | 3963 | 4513  | 91    |
| H(18B) | 6633 | 3989 | 6131  | 91    |
| H(18C) | 6336 | 4427 | 4914  | 91    |
| H(26A) | 5361 | 797  | 9205  | 58    |
| H(26B) | 5829 | 1017 | 10450 | 58    |
| H(26C) | 5701 | 291  | 10196 | 58    |
| H(27A) | 6834 | 57   | 9790  | 45    |
| H(27B) | 6962 | 768  | 10213 | 45    |
| H(27C) | 7223 | 495  | 8723  | 45    |
| H(28A) | 5746 | 354  | 6974  | 68    |
| H(28B) | 6174 | -179 | 7666  | 68    |
| H(28C) | 6476 | 336  | 6633  | 68    |

---



**Table S6.** Torsion angles [°] for **4**.

|                         |           |
|-------------------------|-----------|
| C(6)-N(1)-C(2)-C(3)     | -0.8(4)   |
| C(6)-N(1)-C(2)-C(7)     | 176.0(2)  |
| N(1)-C(2)-C(3)-C(4)     | 1.8(4)    |
| C(7)-C(2)-C(3)-C(4)     | -175.4(2) |
| N(1)-C(2)-C(3)-C(9)     | 179.4(2)  |
| C(7)-C(2)-C(3)-C(9)     | 2.2(3)    |
| C(2)-C(3)-C(4)-C(5)     | -1.1(4)   |
| C(9)-C(3)-C(4)-C(5)     | -178.2(3) |
| C(3)-C(4)-C(5)-C(6)     | -0.3(4)   |
| C(2)-N(1)-C(6)-C(5)     | -0.8(4)   |
| C(4)-C(5)-C(6)-N(1)     | 1.3(4)    |
| N(1)-C(2)-C(7)-N(10)    | 35.5(3)   |
| C(3)-C(2)-C(7)-N(10)    | -147.3(2) |
| N(1)-C(2)-C(7)-C(8)     | 164.2(2)  |
| C(3)-C(2)-C(7)-C(8)     | -18.6(3)  |
| N(10)-C(7)-C(8)-C(9)    | 156.0(2)  |
| C(2)-C(7)-C(8)-C(9)     | 27.2(3)   |
| C(4)-C(3)-C(9)-C(8)     | -167.5(3) |
| C(2)-C(3)-C(9)-C(8)     | 15.3(3)   |
| C(7)-C(8)-C(9)-C(3)     | -26.1(3)  |
| C(2)-C(7)-N(10)-C(19)   | 50.5(3)   |
| C(8)-C(7)-N(10)-C(19)   | -71.2(3)  |
| C(2)-C(7)-N(10)-C(11)   | -137.9(2) |
| C(8)-C(7)-N(10)-C(11)   | 100.3(3)  |
| C(19)-N(10)-C(11)-C(12) | -121.1(3) |
| C(7)-N(10)-C(11)-C(12)  | 66.8(3)   |
| C(19)-N(10)-C(11)-C(18) | 111.6(3)  |
| C(7)-N(10)-C(11)-C(18)  | -60.5(4)  |
| N(10)-C(11)-C(12)-C(13) | 32.4(4)   |
| C(18)-C(11)-C(12)-C(13) | 157.2(3)  |
| N(10)-C(11)-C(12)-C(17) | -150.3(2) |
| C(18)-C(11)-C(12)-C(17) | -25.5(4)  |
| C(17)-C(12)-C(13)-C(14) | -0.2(4)   |
| C(11)-C(12)-C(13)-C(14) | 177.2(2)  |
| C(12)-C(13)-C(14)-C(15) | -0.4(4)   |
| C(13)-C(14)-C(15)-C(16) | 0.8(4)    |
| C(14)-C(15)-C(16)-C(17) | -0.6(4)   |
| C(15)-C(16)-C(17)-C(12) | -0.1(4)   |

|                         |           |
|-------------------------|-----------|
| C(13)-C(12)-C(17)-C(16) | 0.4(4)    |
| C(11)-C(12)-C(17)-C(16) | -177.0(3) |
| C(7)-N(10)-C(19)-O(20)  | -179.8(3) |
| C(11)-N(10)-C(19)-O(20) | 8.7(4)    |
| C(7)-N(10)-C(19)-O(21)  | 4.9(3)    |
| C(11)-N(10)-C(19)-O(21) | -166.7(2) |
| O(20)-C(19)-O(21)-C(22) | 43.7(3)   |
| N(10)-C(19)-O(21)-C(22) | -140.6(2) |
| C(19)-O(21)-C(22)-O(23) | 14.3(4)   |
| C(19)-O(21)-C(22)-O(24) | -167.3(2) |
| O(23)-C(22)-O(24)-C(25) | 4.4(4)    |
| O(21)-C(22)-O(24)-C(25) | -173.9(2) |
| C(22)-O(24)-C(25)-C(26) | -64.7(3)  |
| C(22)-O(24)-C(25)-C(27) | 177.5(2)  |
| C(22)-O(24)-C(25)-C(28) | 60.3(3)   |

The crystallographic data of **4** have been deposited at the Cambridge Crystallographic Data Centre as supplementary publication number CCDC 1410888.

#### 4. Potential energy curve of the C2-O2 bond breaking of the *trans*-species of **4**

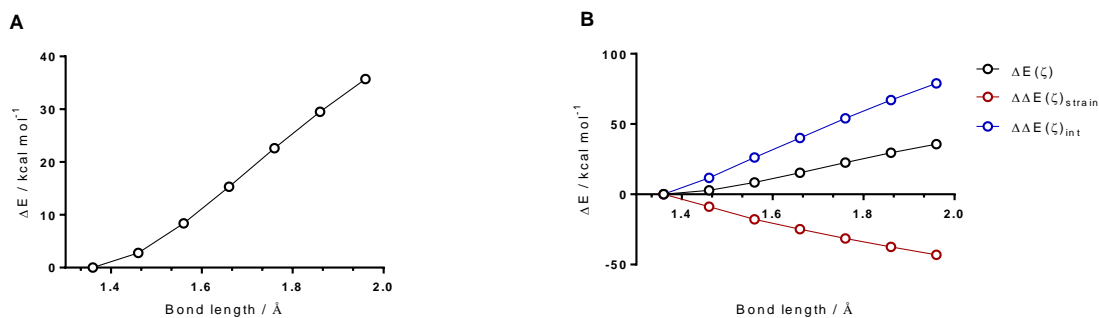

**Figure S14.** Potential energy curve (A) of the C<sub>(2)</sub>-O<sub>(2)</sub> bond breaking of the *trans*-species of **4**, as a function of the C2-O2 bond length (steps of 0.1 Å). Geometry optimized at a fixed bond length of 1.96 Å. (B)  $\Delta E(\zeta)$ ,  $\Delta\Delta E(\zeta)_{\text{strain}}$  and  $\Delta\Delta E(\zeta)_{\text{int}}$  values plotted as a function of the C2-O2 bond length (steps of 0.1 Å) for the *trans*-species of **4**. All calculations were made at the wB97XD/6-31+G(d,p) level of theory in implicit chloroform.

5. Potential energy curve of the N1-C1 bond breaking of the *cis*-species of **4**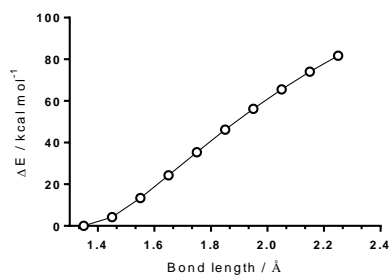

**Figure S15.** Potential energy curve of the N1-C1 bond breaking of the *cis*-species of **4**, as a function of the N1-C1 bond length (steps of 0.1 Å). Calculated at the wB97XD/6-31+G(d,p) level of theory, in implicit chloroform.
